# Supplementary material
Source: HighWire-hosted journal article supplement (https://molpharm.aspetjournals.org/content/suppl/2019/08/09/mol.119.117259)
Supplement: 117259_Atwal_Supplemental.pdf [file 117259_Atwal_Supplemental.pdf]

Atwal et al Molecular Pharmacology

**Supplemental Data**

**Intercalating TOP2 poisons attenuate topoisomerase action at higher concentrations**

Mandeep Atwal, Rebecca L. Swan, Chloe Rowe, Ka C. Lee, David C Lee, Lyle Armstrong, Ian G Cowell\*, Caroline A Austin\*

**Table of Contents**

Supplemental Figure Legend

Supplemental Figures 1

## Supplemental Figure Legends

**Supplemental Figure 1. Characteristics of inhouse antibodies used in this study. (A)** TOP2 domain structure and location of immunogen polypeptide regions. The divergent C-terminal domains of TOP2A and TOP2B are coloured. Polyclonal antibodies 4566 & 4555 were raised in rabbits immunized with GST-fusion proteins containing amino acids 1244-1531 of TOP2A or 1263-1621 of TOP2B respectively. Polyclonal 4882 was produced in a rabbit immunized with a calf thymus TOP2 prep containing predominantly C-terminally truncated TOP2. **(B)** Western blot validation of antisera 4566 and 4555. rTOP2A & rTOP2B, recombinant TOP2A and B respectively, expressed in and purified from yeast; K562 WCE, whole cell extract derived from K562 cells; Nalm<sup>TOP2B-/-</sup>, whole cell extract derived from TOP2B null Nalm6 cells (human pre-B leukemia cell line). **(C)** TARDIS analysis in K562 and Nalm<sup>TOP2B-/-</sup> cells, confirming lack of etoposide induced signal in TOP2B null Nalm<sup>TOP2B-/-</sup> cells (but efficient induction of signal in K562 cells) with antibody 4555, but efficient induction of signal in these cells with antibody 4566. **(D-F)** Western blot validation of antibody 4882 (note TOP2A and TOP2B frequently fail to resolve from each other in WCEs run on mini-gels). **(G)** Nuclear immunofluorescent staining pattern with antibody 4882 in WT and TOP2B null Nalm6 cells.

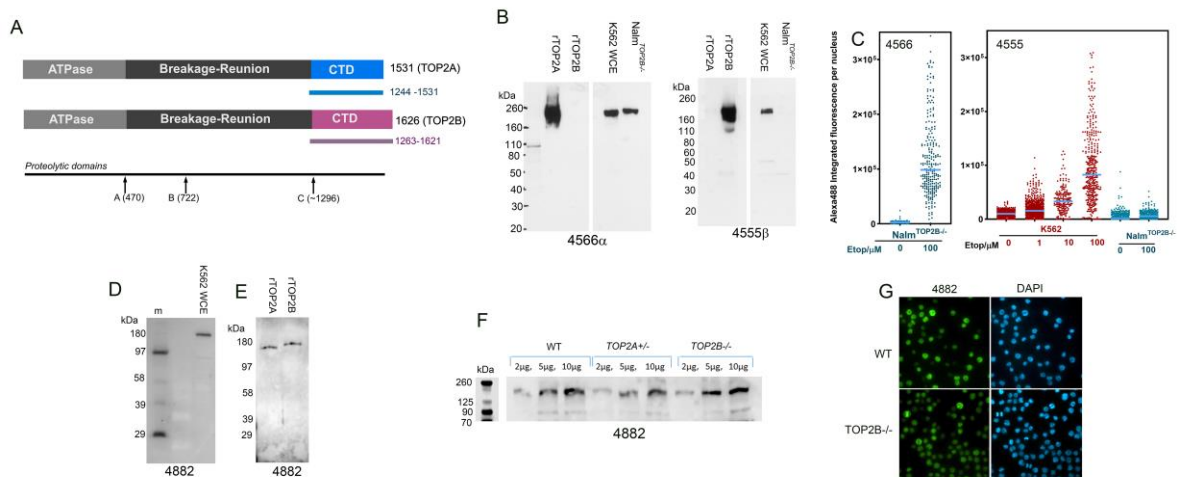

Supplemental Figure 1
